# Supplementary material for: The Effects of Ischemia During Rest Intervals on Bar Velocity in the Bench Press Exercise With Different External Loads
Source: Front Physiol. 2021 Aug 10;12:715096. doi: 10.3389/fphys.2021.715096 (PMC8383203; doi:10.3389/fphys.2021.715096)
Supplement: Supplementary file 1 [file Data_Sheet_1.XLSX]

## Sheet: Data
	Peak Velocity
	NO-BFR								BFR
	20%1RM	30%1RM	40%1RM	50%1RM	60%1RM	70%1RM	80%1RM	90%1RM	20%1RM	30%1RM	40%1RM	50%1RM	60%1RM	70%1RM	80%1RM	90%1RM			80% AOP	1RM	wiek	waga	wzrost	staż
1	2.38	1.87	1.58	1.32	1.15	0.88	0.78	0.52	2.21	1.92	1.77	1.45	1.11	1	0.65	0.55			112	140	24	93	187	6	1.50538
2	2.13	1.69	1.39	1.19	0.99	0.81	0.62	0.44	2.11	1.7	1.48	1.26	1	0.87	0.59	0.41			112	130	21	84	184	5	1.54762
3	2.49	2.06	1.94	1.55	1.18	1.06	0.91	0.78	2.81	2.37	2.02	1.7	1.41	1.15	1	0.78			120	140	26	95	177	11	1.47368
4	2.53	2.07	2.09	1.58	1.36	1.1	0.83	0.71	2.47	2.09	1.93	1.56	1.31	1.16	0.92	0.87			130	140	27	92	176	11	1.52174
5	2.05	1.71	1.42	0.87	0.97	0.78	0.64	0.5	2.17	1.76	1.45	1.21	0.97	0.82	0.65	0.5			112	150	21	94	175	8	1.59574
6	1.9	1.67	1.17	1.07	0.89	0.84	0.63	0.45	2.09	1.68	1.24	1.1	0.95	0.78	0.59	0.51			96	120	23	79	181	6	1.51899
7	1.98	1.74	1.22	1.11	0.93	0.87	0.66	0.47	2.17	1.75	1.29	1.14	0.99	0.81	0.61	0.53			105	125	24	82	187	5	1.52439
8	1.86	1.64	1.15	1.05	0.87	0.82	0.62	0.44	2.13	1.71	1.26	1.12	0.97	0.8	0.6	0.52			125	150	30	97	170	8	1.54639
9	2.29	1.9	1.78	1.43	1.09	0.98	0.84	0.72	2.59	2.18	1.86	1.56	1.3	1.06	0.92	0.72			120	180	35	95	167	12	1.89474
10	2.13	1.78	1.48	0.9	1.01	0.81	0.67	0.52	2.26	1.83	1.51	1.26	1.01	0.85	0.68	0.52			115	150	32	87	176	6	1.72414
																			114.7	142.5	26.3	89.8	178	7.8	1.58528
	2.174	1.813	1.522	1.207	1.044	0.895	0.72	0.555	2.301	1.899	1.581	1.336	1.102	0.93	0.721	0.591			9.78718	16.8737	4.71522	6.30344	6.74949	2.65832	0.128696
	Mean Velocity
	NO-BFR								BFR
	20%1RM	30%1RM	40%1RM	50%1RM	60%1RM	70%1RM	80%1RM	90%1RM	20%1RM	30%1RM	40%1RM	50%1RM	60%1RM	70%1RM	80%1RM	90%1RM
1	1.57	1.16	1.01	0.9	0.76	0.63	0.5	0.37	1.62	1.38	1.16	0.94	0.74	0.7	0.5	0.34
2	1.45	1.14	1.02	0.87	0.73	0.59	0.42	0.28	1.44	1.14	1.05	0.94	0.7	0.62	0.42	0.31
3	1.56	1.43	1.25	0.92	0.8	0.71	0.62	0.55	1.75	1.53	1.28	1.17	0.94	0.76	0.64	0.53
4	1.74	1.44	1.42	1.17	1.08	0.87	0.73	0.48	1.66	1.43	1.38	1.12	0.99	0.85	0.69	0.59
5	1.39	1.2	1.02	0.84	0.71	0.55	0.43	0.29	1.51	1.21	1	0.84	0.66	0.56	0.44	0.3
6	1.25	1.16	0.8	0.72	0.62	0.53	0.44	0.32	1.27	1.05	0.83	0.72	0.62	0.54	0.39	0.24
7	1.29	1.21	0.83	0.75	0.64	0.55	0.45	0.33	1.32	1.09	0.86	0.74	0.64	0.56	0.41	0.24
8	1.22	1.14	0.78	0.71	0.61	0.52	0.43	0.31	1.24	1.03	0.81	0.7	0.6	0.52	0.38	0.23
9	1.44	1.31	1.15	0.85	0.74	0.65	0.57	0.5	1.61	1.4	1.17	1.07	0.86	0.69	0.58	0.48
10	1.44	1.24	1.06	0.87	0.73	0.57	0.45	0.3	1.57	1.25	1.04	0.87	0.69	0.58	0.46	0.31
